# Supplementary material for: Emotion Control Predicts Internalizing and Externalizing Behavior Problems in Boys With and Without an Autism Spectrum Disorder
Source: J Autism Dev Disord. 2018 Mar 6;48(8):2727–39. doi: 10.1007/s10803-018-3519-8 (PMC6061024; doi:10.1007/s10803-018-3519-8)
Supplement: Supplementary file 1 — Supplementary material 1 (DOCX 34 KB) [file 10803_2018_3519_MOESM1_ESM.docx]

**Supplementary Table 1**. Mean and standard deviations of all predictors and outcome variables for each group separately.

|  |  | **ASD** | |  | **Controls** | |
| --- | --- | --- | --- | --- | --- | --- |
|  | n | M | *SD* | n | M | *SD* |
| **T1** |  |  |  |  |  |  |
| Disruptive behavior*** | 60 | 73.40 | *13.16* | 86 | 54.91 | *10.11* |
| Anxiety*** | 60 | 14.83 | *4.30* | 86 | 9.90 | *2.66* |
| Depression** | 66 | 37.09 | *5.88* | 89 | 34.51 | *4.43* |
| Somatization* | 65 | 16.05 | *3.88* | 89 | 14.80 | *3.00* |
| Negative Emotionality*** | 65 | 18.40 | *4.70* | 89 | 15.92 | *3.34* |
| Poor Emotion Awareness | 64 | 26.09 | *4.93* | 89 | 26.54 | *4.30* |
| Worry/Rumination | 65 | 19.63 | *4.54* | 89 | 18.29 | *4.24* |
| **T2** |  |  |  |  |  |  |
| Disruptive behavior*** | 56 | 70.55 | *11.61* | 77 | 54.66 | *9.43* |
| Anxiety*** | 56 | 15.20 | *4.61* | 77 | 10.01 | *2.40* |
| Depression** | 61 | 37.65 | *6.26* | 84 | 34.60 | *4.54* |
| Somatization | 59 | 16.75 | *4.25* | 84 | 16.00 | *3.98* |
| Negative Emotionality | 59 | 17.32 | *5.44* | 84 | 16.68 | *4.05* |
| Poor Emotion Awareness | 60 | 27.38 | *4.95* | 83 | 26.60 | *3.91* |
| Worry/Rumination | 59 | 17.95 | *5.14* | 84 | 17.36 | *4.22* |
| **T3** |  |  |  |  |  |  |
| Disruptive behavior*** | 50 | 70.97 | *12.81* | 65 | 53.47 | *9.67* |
| Anxiety*** | 56 | 14.32 | *3.74* | 65 | 9.77 | *2.95* |
| Depression* | 57 | 35.60 | *6.86* | 71 | 33.45 | *4.67* |
| Somatization | 56 | 16.43 | *4.16* | 71 | 15.79 | *3.71* |
| Negative Emotionality | 56 | 17.64 | *5.58* | 71 | 16.45 | *4.20* |
| Poor Emotion Awareness | 56 | 27.41 | *4.21* | 71 | 26.23 | *4.27* |
| Worry/Rumination | 56 | 17.36 | *4.57* | 71 | 17.17 | *3.69* |

* *p* < .05, ** *p* < .01, *** *p* <.001

**Supplementary Table 2**.Results of the linear mixed model to assess the developmental trajectory of each outcome variable. Estimates of the beta’s are reported.

|  | Disruptive behavior | Symptoms of anxiety | Symptoms of depression | Somatic Complaints |
| --- | --- | --- | --- | --- |
| **Model 1** |  |  |  |  |
| Intercept | 61.84*** | 11.98*** | 35.30*** | 15.86*** |
| AIC/BIC | 2884.46/  2892.41 | 1983.86/  1991.81 | 2571.19/  2579.30 | 2215.20/  2223.29 |
| Df | 3 | 3 | 3 | 3 |
|  |  |  |  |  |
| **Model 2** |  |  |  |  |
| Intercept | 64.94*** | 12.27*** | 36.96*** | 15.15*** |
| Age | -0.97*** | -0.09 | -0.52** | 0.22 |
| AIC/BIC | 2860.64/  2872.57 | 1976.65/  1984.59 | 2565.94/  2574.05 | 2214.80/  2222.89 |
| Df | 4 | 4 | 4 | 4 |
|  |  |  |  |  |
| **Model 3** |  |  |  |  |
| Intercept | 57.66*** | 10.41*** | 35.45*** | 14.34*** |
| Age | -1.03* | -0.16 | -0.40 | 0.37* |
| Group | 19.61*** | 4.98*** | 3.93* | 2.15* |
| Age x Group | -0.61 | -0.01 | -0.40 | -0.41 |
| AIC/BIC | 2773.26/  2781.18 | 1904.10/  1912.02 | 2551.08/  2559.18 | 2210.53/  2218.61 |
| df | 6 | 6 | 6 | 6 |

* *p* < .05, ** *p* < .01, *** *p* <.001

**Supplementary Table 3.** Correlation table of all outcome and predictor variables at all Timepoints.

|  | 1 | 2 | 3 | 4 | 5 | 6 | 7 | 8 | 9 | 10 | 11 | 12 | 13 | 14 | 15 | 16 | 17 | 18 | 19 | 20 | 21 |
| --- | --- | --- | --- | --- | --- | --- | --- | --- | --- | --- | --- | --- | --- | --- | --- | --- | --- | --- | --- | --- | --- |
| 1. Disruptive behavior T1 | 1 |  |  |  |  |  |  |  |  |  |  |  |  |  |  |  |  |  |  |  |  |
| 1. Disruptive behavior T2 | .83*** | 1 |  |  |  |  |  |  |  |  |  |  |  |  |  |  |  |  |  |  |  |
| 1. Disruptive behavior T3 | .82*** | .88*** | 1 |  |  |  |  |  |  |  |  |  |  |  |  |  |  |  |  |  |  |
| 1. Generalized Anxiety T1 | .79*** | .66*** | .59*** | 1 |  |  |  |  |  |  |  |  |  |  |  |  |  |  |  |  |  |
| 1. Generalized Anxiety T2 | .69*** | .75*** | .66*** | .85*** | 1 |  |  |  |  |  |  |  |  |  |  |  |  |  |  |  |  |
| 1. Generalized Anxiety T3 | .69*** | .62*** | .71*** | .77*** | .77*** | 1 |  |  |  |  |  |  |  |  |  |  |  |  |  |  |  |
| 1. Depression T1 | .42*** | .42*** | .47*** | .36*** | .33*** | .44*** | 1 |  |  |  |  |  |  |  |  |  |  |  |  |  |  |
| 1. Depression T2 | .41*** | .51*** | .45*** | .33*** | .40*** | .42*** | .57*** | 1 |  |  |  |  |  |  |  |  |  |  |  |  |  |
| 1. Depression T3 | .46*** | .48*** | .48*** | .36*** | .41*** | .39*** | .44*** | .66*** | 1 |  |  |  |  |  |  |  |  |  |  |  |  |
| 1. Somatic Complaints T1 | .31*** | .25** | .36*** | .27*** | .28*** | .39*** | .56*** | .41*** | .35*** | 1 |  |  |  |  |  |  |  |  |  |  |  |
| 1. Somatic Complaints T2 | .16 | .21* | .21* | .22* | .26** | .37*** | .40*** | .51*** | .45*** | .60*** | 1 |  |  |  |  |  |  |  |  |  |  |
| 1. Somatic Complaints T3 | .22* | .26** | .25** | .28** | .39*** | .41*** | .25** | .44*** | .56*** | .49*** | .69*** | 1 |  |  |  |  |  |  |  |  |  |
| 1. Negative Emotionality T1 | .32*** | .37*** | .45*** | .27*** | .31*** | .41*** | .52*** | .51*** | .33*** | .54*** | .47*** | .33 | 1 |  |  |  |  |  |  |  |  |
| 1. Negative Emotionality T2 | .16 | .27** | .23* | .19* | .22*** | .25** | .36** | .47** | .34** | .30** | .58*** | .37*** | .48*** | 1 |  |  |  |  |  |  |  |
| 1. Negative Emotionality T3 | .24** | .33*** | .29** | .29** | .38*** | .38*** | .25* | .39*** | .53*** | .33*** | .51*** | .65*** | .39*** | .61*** | 1 |  |  |  |  |  |  |
| 1. Emotion awareness T1 | -.09 | -.09 | -.10 | -.05 | -.15 | -.17 | -.24** | -.23** | -.20* | -.40*** | -.36*** | -.27** | -.32*** | -.21* | -.27*** | 1 |  |  |  |  |  |
| 1. Emotion awareness T2 | -.02 | -.07 | .03 | -.08 | -.23** | -.09 | -.07 | -.26** | -.25** | -.15 | -.39*** | -.33*** | -.11 | -.47*** | -.46*** | .37*** | 1 |  |  |  |  |
| 1. Emotion awareness T3 | -.01 | -.04 | -.05 | -.05 | -.12 | -.14 | -.10 | -.25** | -.29** | -.18* | -.42*** | -.47*** | -.18* | -.33*** | -.48*** | .48*** | .57*** | 1 |  |  |  |
| 1. Worry/Rumination T2 | .14 | .12 | .24* | .18* | .16 | .27** | .36*** | .27*** | .37*** | .41*** | .47*** | .40*** | .44*** | .33*** | .37*** | -.52*** | -.28*** | -.39*** | 1 |  |  |
| 1. Worry/Rumination T3 | .18* | .26*** | .19* | .19* | .21* | .19* | .21* | .39*** | .40*** | .23** | .46*** | .38*** | .32*** | .58*** | .53*** | -.32*** | -.61*** | -.40*** | .52*** | 1 |  |
| 1. Worry/Rumination T1 | .12 | .23* | .23* | .16 | .26** | .30** | .17 | .31*** | .38*** | .16 | .43*** | .52*** | .18* | .43*** | .59*** | -.26* | -.46*** | -.57*** | .44*** | .65*** | 1 |

* p < .05; ** p < .01; *** p <.001

**Supplementary Table 4.** ICC for all outcome and predictor variables between Timepoint 1, 2, and 3

|  | ICC single measure | ICC average measure |
| --- | --- | --- |
| Disruptive behavior | .85 | .95 |
| Anxiety | .81 | .93 |
| Depression | .55 | .79 |
| Somatic complaints | .58 | .80 |
|  |  |  |
| Negative emotionality | .48 | .73 |
| Emotion Awareness | .47 | .73 |
| Worry/Rumination | .52 | .76 |
